# Supplementary material for: Ultra-sensitive detection of florfenicol by flow injection chemiluminescence immunoassay based on Nickel/Cobalt bimetallic metal–organic framework nanozymes
Source: Royal Society of Chemistry journal article supplement (doi:10.1039/d2an00126h), 2022-01-01
Supplement: d2an00126h1.pdf [file d2an00126h1.pdf]

## Supplementary Material

### **Ultra-sensitive detection of florfenicol by flow injection chemiluminescence immunoassay based on Nickel/Cobalt bimetallic metal-organic framework nanozymes**

Xinziwei Zeng<sup>a,&</sup>, Huiling Liu<sup>a,&</sup>, Kang Wu<sup>b,\*</sup>, Anping Deng<sup>a,\*</sup>, Jianguo Li<sup>a,\*</sup>

<sup>a</sup> The Key Lab of Health Chemistry & Molecular Diagnosis of Suzhou, College of Chemistry, Chemical Engineering & Materials Science, Soochow University, Suzhou 215123, P.R. China

<sup>b</sup> School of Biology & Basic Medical Science, Soochow University, Suzhou 215123, P.R. China

---

& Xinziwei Zeng and Huiling Liu contributes equally to this work.

\* Corresponding Authors: J.G. Li, Phone: +86 51265882195, Fax: +86 51265882195, E-mail: lijgsd@suda.edu.cn; A.P. Deng, Phone: +86 51265882362, Fax: +86 51265882362, E-mail: denganping@suda.edu.cn; K. Wu, Phone: +86 51265880178, Fax: +86 51265880178, E-mail: wukang650202@163.com

## Contents

|                                                                  |           |
|------------------------------------------------------------------|-----------|
| <b>Apparatus .....</b>                                           | <b>3</b>  |
| <b>Materials and Reagents .....</b>                              | <b>3</b>  |
| <b>Solutions and Buffers.....</b>                                | <b>4</b>  |
| <b>Preparation of Ni/Co-MOF<sub>0.75</sub> nanospheres .....</b> | <b>4</b>  |
| <b>Figure S1 .....</b>                                           | <b>5</b>  |
| <b>Figure S2 .....</b>                                           | <b>6</b>  |
| <b>Figure S3 .....</b>                                           | <b>7</b>  |
| <b>Figure S4 .....</b>                                           | <b>8</b>  |
| <b>Figure S5 .....</b>                                           | <b>9</b>  |
| <b>Table S1.....</b>                                             | <b>10</b> |
| <b>Table S2.....</b>                                             | <b>11</b> |

## Apparatus

The flow injection chemiluminescence measurement was carried out using an IFFM-E luminescence analyzer (China Xi'an Remax Analytical Instrument Co., Ltd.) equipped with an IFFS-A multifunctional chemiluminescence detector. Teflon tubing (0.8 mm inner diameter) is used to connect all components in the flow system.

SU8010 scanning electron microscope (Hitachi High-tech Co. LTD. Japan) with scanning voltage of 5kV. TECNAI G2 20 high-resolution transmission electron microscopy (FEI Company of America).

## Materials and Reagents

Polyclonal antibodies to FF and their coating antigens were provided by our laboratory and assessed by ELISA. Carboxyl resin beads (diameter: 150 $\mu$ m; sphericity: >99%; crosslinking degree: 7%; content of water: 30%–40%) were purchased from Nanjing Microsphere High Efficiency Isolation Carrier Co., Ltd. (Nanjing, China).

Casein and luminol (98%) were purchased from Sigma Co., Ltd (St Louis, USA). 2-Morpholineethanesulfonic acid (MES) was purchased from TCI Shanghai Chemical Industry Development Co., Ltd. Thiamphenicol (TAP), chloramphenicol (CAP) and florfenicol (FF) were purchased from Aladdin (Shanghai, China). Norfloxacin (NOR) and ofloxacin (OFL) were obtained from Beijing Shanglifang Joint Chemical Research Institute (China). Sodium hydroxide (NaOH), disodium hydrogen phosphate dodecahydrate ( $\text{Na}_2\text{HPO}_4 \cdot 12\text{H}_2\text{O}$ , 99% purchased from Sinopharm Chemical Reagent Co., Ltd. (Shanghai, China)), monopotassium phosphate ( $\text{KH}_2\text{PO}_4$ , 99%), tris(hydroxymethyl) aminomethane (tris, 99%), hydrogen peroxide ( $\text{H}_2\text{O}_2$ , 30%), Tween-20 and N-hydroxysuccinimide (NHS, 97%), ethyl-3-(dimethylaminopropyl) carbodiimide (EDC, 98%), trimesic acid ( $\text{H}_3\text{BTC}$ , 99%) was provided by J&K Scientific (Beijing, China). Bovine serum albumin (BSA, 98%), Nickel nitrate hexahydrate (99.99%), Cobalt Nitrate Hexahydrate(99%) was provided by Shanghai Aladdin

Biochemical Technology Co., Ltd.

## **Solutions and Buffers**

Tris-HCl buffer solution was prepared by dissolving 12.113 g Tris in 1 L deionized water and using 4 M HCl to adjust its pH to 8.5. Assay buffer of 0.01 M phosphate-buffered saline (PBS, pH 7.4) was prepared by NaCl, Na<sub>2</sub>HPO<sub>4</sub>·12H<sub>2</sub>O, KCl, and KH<sub>2</sub>PO<sub>4</sub>. In order to facilitate preservation, we first prepared high-concentration PBS, which was diluted 10 times before use. The washing buffer (PBST) was 0.05% (v/v) Tween-20 in PBS, and the blocking solution was 2% casein in PBS, and stored in a refrigerator at 4 °C for later use.

The stock solution of luminol (0.01 M) was used by dissolving 0.0885 luminol in 50 ml of 0.1 M NaOH and then placed in the dark for more than 24 hours. Before use, the luminol and H<sub>2</sub>O<sub>2</sub> solutions were diluted to optimal concentrations with 0.1 M Tris-HCl buffer solution (pH 8.5). The CL substrate solution consisted of 0.5 mM luminol and 10 mM H<sub>2</sub>O<sub>2</sub>. Obtain the coating antigen stock by diluting the 1.7 mg mL<sup>-1</sup> stock to 1 mg mL<sup>-1</sup> with 0.01 M PBS and store in a refrigerator at 4 °C for future use. All reagents and chemicals are of analytical grade. All aqueous solutions were prepared with sub-boiling distilled deionized water.

## **Preparation of Ni/Co-MOF<sub>0.75</sub> nanospheres**

Briefly, Ni(NO<sub>3</sub>)<sub>2</sub>·6H<sub>2</sub>O (1.5 mmol), Co(NO<sub>3</sub>)<sub>2</sub>·6H<sub>2</sub>O (0.75 mmol) and trimesic acid H<sub>3</sub>BTC (0.3 mmol) were dissolved in 30 mL of N,N-dimethylmethane amide (DMF) at room temperature with a magnetic stirrer for 20 minutes. Afterwards, the clarified mixture was transferred to a 50 ml Teflon-lined steel autoclave and kept at 150 °C for 12 hours. After natural cooling, the lavender color precipitate is collected from the mixed solution by centrifugal operation. Finally, rinse the lavender precipitate with DMF and EtOH to remove excess metal ions and residual ligands, and dry it in a vacuum drying oven for later use.

**Figure S1**

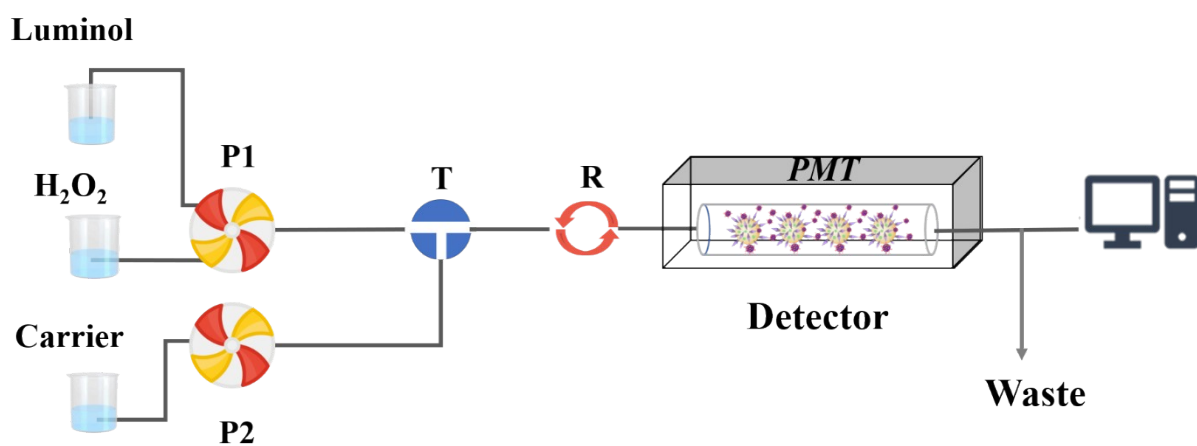

**Figure S1.** Schematic diagram of flow injection analysis. P1 stands for peristaltic pump 1 with the flow rate of  $0.5 \text{ mL min}^{-1}$ , P2 stands for peristaltic pump 2 with the flow rate of  $2 \text{ mL min}^{-1}$ , T stands for the three-way valve, R stands for the reversing valve.

**Figure S2**

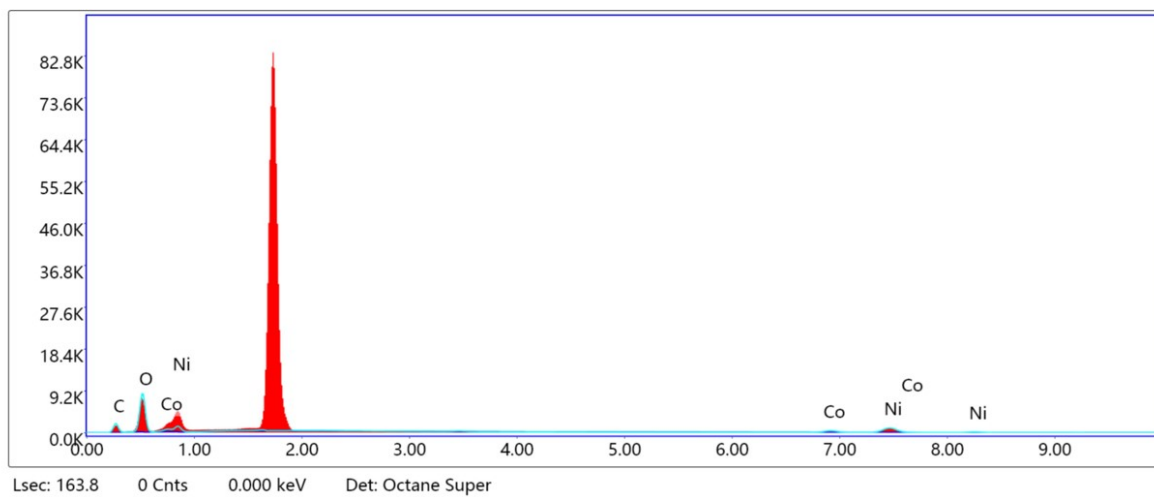

**Figure S2.** EDX spectrum of Ni/Co-MOF<sub>0.75</sub> nanospheres.

**Figure S3**

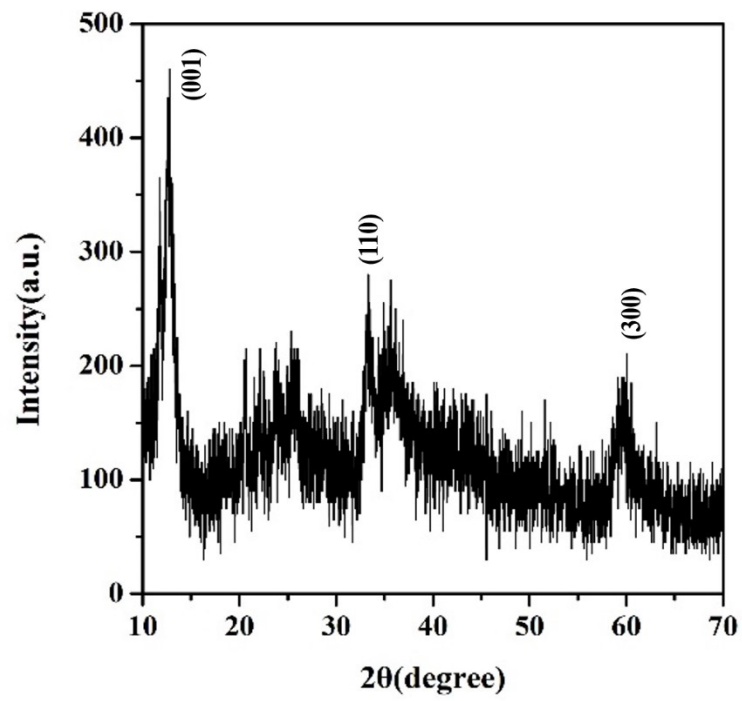

**Figure S3.** XRD characterization of Ni/Co-MOF<sub>0.75</sub> nanospheres

**Figure S4**

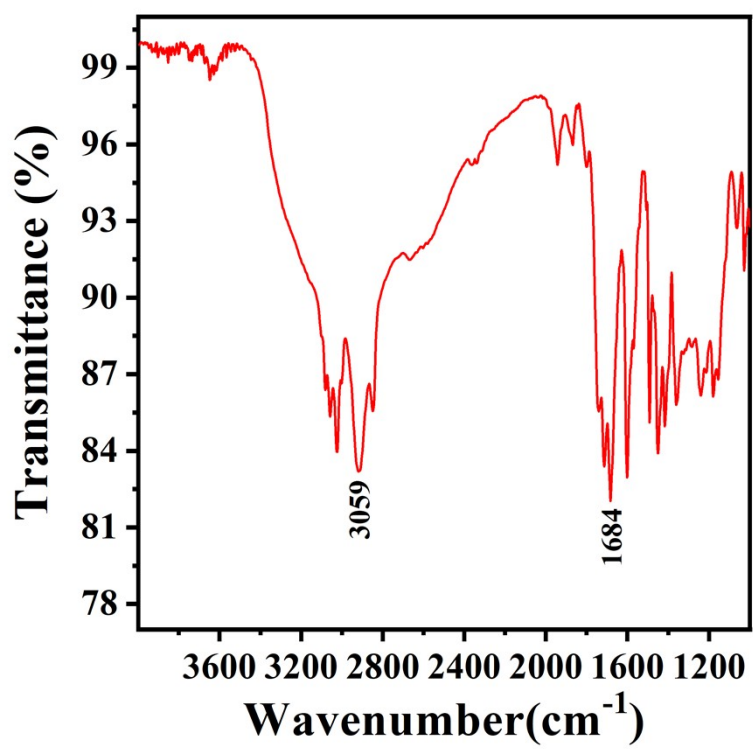

**Figure S4.** IR image of Ni/Co-MOF<sub>0.75</sub> nanospheres



**Figure S5**

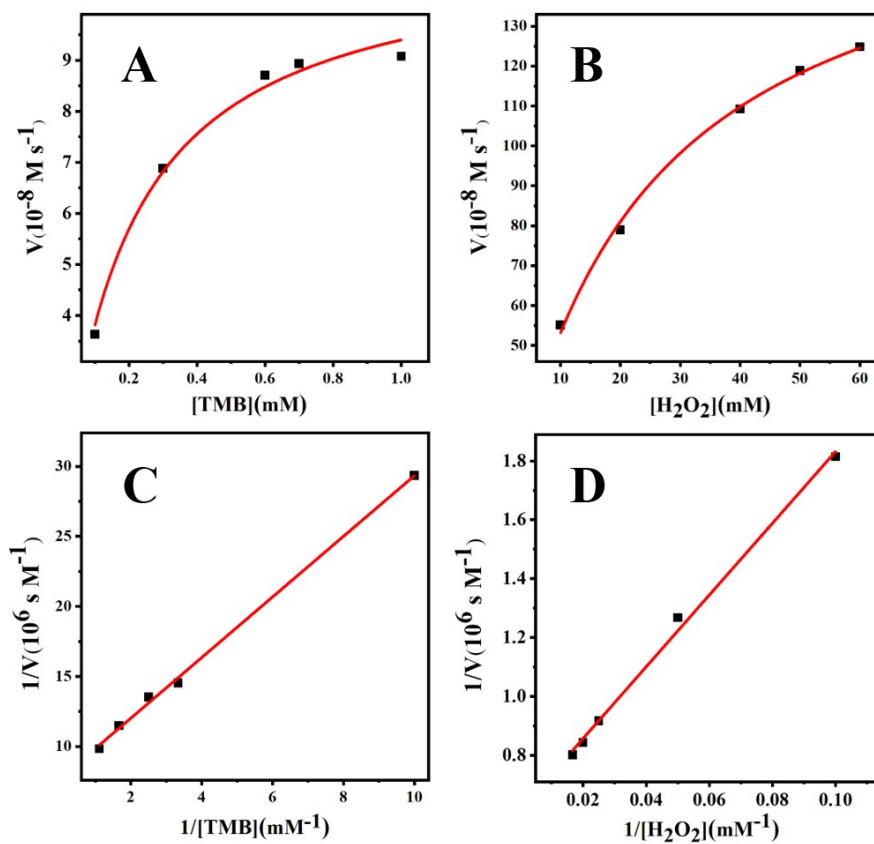

**Figure S5.** Steady-state kinetic analysis using the Michaelis-Menten model (A, B) and Lineweaver-Burk model (C, D) for the Ni/Co-MOF<sub>0.75</sub> nanospheres.

## Table S1

**Table S1.** Relevant steady-state kinetic parameters of Ni/Co-MOF<sub>0.75</sub> nanospheres

| Catalyst                  | Substrate                     | K <sub>m</sub> (mM) | V <sub>max</sub> (10 <sup>-8</sup> M s <sup>-1</sup> ) |
|---------------------------|-------------------------------|---------------------|--------------------------------------------------------|
| Ni/Co-MOF <sub>0.75</sub> | TMB                           | 0.22                | 11.6                                                   |
|                           | H <sub>2</sub> O <sub>2</sub> | 23.5                | 174.6                                                  |
| HRP                       | TMB                           | 0.43                | 10.0                                                   |
|                           | H <sub>2</sub> O <sub>2</sub> | 3.7                 | 8.7                                                    |

**Table S2****Table S2.** Molecular formula of several different antibiotics

| Substance       | Molecular Formula        | CAS No.    | Structural Formula                                                                   |
|-----------------|--------------------------|------------|--------------------------------------------------------------------------------------|
| Florfenicol     | $C_{12}H_{14}Cl_2FNO_4S$ | 73231-34-2 | 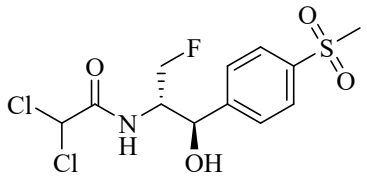   |
| Thiamphenicol   | $C_{12}H_{15}Cl_2NO_5S$  | 15318-45-3 |    |
| Norfloxacin     | $C_{16}H_{18}FN_3O_3$    | 70458-96-7 |   |
| Chloramphenicol | $C_{11}H_{12}Cl_2N_2O_5$ | 56-75-7    |  |
| Ofloxacin       | $C_{18}H_{20}FN_3O_4$    | 82419-36-1 |  |
